# Supplementary material for: Comparison of Oral Microbe Quantities from Tongue Samples and Subgingival Pockets
Source: Hindawi journal article supplement (doi:10.1155/2018/2048390), 2018-01-01
Supplement: f1 [file 2048390.f1.pdf]

# SUPPLEMENTARY MATERIAL

**Supplemental Table 1.** Sequence information, specificity, amplicon size, and molarity of oligonucleotide primers and probes used in the qPCR assays.

| Taxon                                        | Oligonucleotide sequence (5' -> 3') <sup>a</sup> | Target gene; detection limit and amplicon size   | Reference | Molarity |
|----------------------------------------------|--------------------------------------------------|--------------------------------------------------|-----------|----------|
| <i>Porphyromonas gingivalis</i>              | F: AGGATCGCTCAGCGTAGCATT                         | Arg-gingipain                                    | [1]       | 0.10 µM  |
|                                              | R: CCTACGTGTACGGACAGAGCTATA                      | (Rgp), (10 copies/PCR), 71 bp                    | [1]       | 0.50 µM  |
|                                              | P: FAM-TCGCCCCGGGAAGAACTTGTCTTCA-BHQ1            |                                                  | [1]       | 0.10 µM  |
| <i>Aggregatibacter actinomycetemcomitans</i> | F: ACGCAGACGATTAACTGAATTTAA                      | Leukotoxin C                                     | [2]       | 0.10 µM  |
|                                              | R: GATCTTCACAGCTATATGGCAGCTA                     | (lktC), (10 copies/PCR), 77 bp                   | [1]       | 0.25 µM  |
|                                              | P: FAM-TTACCCTTCTACCGTTGCCATGGG-BHQ1             |                                                  | [2]       | 0.10 µM  |
| <i>Fusobacterium nucleatum</i>               | F: TGGCATAGCTTCACCTTTGA                          | β-subunit of RNA polymerase                      | [2]       | 0.25 µM  |
|                                              | R: CAAAGACTTGGGGAAATGGA                          | (rpoB), (10 copies/PCR), 144 bp                  | [2]       | 0.50 µM  |
|                                              | P: FAM-TGCTCCATAAGCTTCCAATGCCCA-BHQ1             |                                                  | [2]       | 0.10 µM  |
| <i>Streptococcus sanguinis</i>               | F: GGCGCCTGTTAATACTGAGC                          | Glycosyl transferase P                           | [3]       | 0.10 µM  |
|                                              | R: GTTTTCCATCCTTGAGGATAGC                        | (gtfP), (10 copies/PCR), 330 bp                  | [3]       | 0.50 µM  |
|                                              | P: FAM-TCGATGCAGAGACCGGAGCC-BHQ1                 |                                                  | [2]       | 0.10 µM  |
| <i>Archaea</i>                               | F: CGGTGAATAYGYCCCTGC                            | 16S ribosomal RNA                                | [4]       | 0.25 µM  |
|                                              | R: AAGGAGGTGATCCRGCCGCA                          | (16S rRNA), (10 <sup>3</sup> copies/PCR), 173 bp | [4]       | 1.00 µM  |
|                                              | P: FAM-CTTGACACACCGCCGTC-BHQ1                    |                                                  | [2]       | 0.10 µM  |
| Bacteria                                     | F: TGGAGCATGTGGTTTAATTCGA                        | 16S ribosomal RNA                                | [5]       | 0.25 µM  |
|                                              | R: TGCGGGACTTAACCAACA                            | (16S rRNA), (10 <sup>3</sup> copies/PCR), 159 bp | [5]       | 0.10 µM  |
|                                              | P: FAM-CACGAGCTGACGACARCCATGCA-BHQ1              |                                                  | [5]       | 0.10 µM  |

<sup>a</sup> F, forward primer; R, reverse primer; P, probe; FAM, 6-carboxyfluorescein; BHQ1, Black Hole Quencher 1.

**Supplemental Table 2.** Correlation of abundances between tongue scrapings and subgingival samples

|                                 | Abundances                                                  |                                                             |                       | Tongue scraping and Subgingival plaque > 0 |                         |
|---------------------------------|-------------------------------------------------------------|-------------------------------------------------------------|-----------------------|--------------------------------------------|-------------------------|
|                                 | Tongue scraping                                             | Subgingival plaque                                          | $r_{SP}$ (95% CI)     | N                                          | $r_{SP}$ (95% CI)       |
| <i>P. gingivalis</i>            | 0<br>(0; $1.5 \cdot 10^{-5}$ )                              | 0<br>(0; $1.9 \cdot 10^{-4}$ )                              | 0.63<br>(0.55-0.70)   | 57                                         | 0.25<br>(-0.01-0.48)    |
| <i>A. actinomycetemcomitans</i> | 0<br>(0; 0)                                                 | 0<br>(0; $8.4 \cdot 10^{-5}$ )                              | 0.16<br>(0.03-0.28)   | 15                                         | 0.03<br>(-0.49-0.53)    |
| <i>F. nucleatum</i>             | 0<br>(0; 0)                                                 | $2.0 \cdot 10^{-3}$<br>(0; $1.4 \cdot 10^{-2}$ )            | 0.21<br>(0.09-0.33)   | 44                                         | 0.06<br>(-0.24-0.35)    |
| <i>S. sanguinis</i>             | 0<br>(0; $3.8 \cdot 10^{-6}$ )                              | 0<br>(0; $2.1 \cdot 10^{-3}$ )                              | 0.56<br>(0.46-0.64)   | 72                                         | 0.17<br>(-0.07-0.38)    |
| Archaea                         | 429.8<br>(0; 656.2)                                         | 0<br>(0; 0)                                                 | -0.10<br>(-0.23-0.03) | 26                                         | 0.25<br>(-0.15-0.58)    |
| % Archaea                       | 0.01<br>(0; 0.02)                                           | 0<br>(0; 0)                                                 | -0.01<br>(-0.14-0.12) | 26                                         | -0.33<br>(-0.64-0.06)   |
| Bacteria                        | $2.6 \cdot 10^6$<br>( $1.5 \cdot 10^6$ ; $4.0 \cdot 10^6$ ) | $1.7 \cdot 10^4$<br>( $9.9 \cdot 10^3$ ; $2.9 \cdot 10^4$ ) | -0.14<br>(-0.26-0.01) | 237                                        | -0.14<br>(-0.26- -0.01) |

Abundances are given as Median (25% quantile, 75% quantile).  $r_{SP}$ , Spearman's correlation coefficient; CI, confidence interval

**Supplemental Table 3.** Median relative abundances (log10 transformed; with 25% and 75% quantiles) from subgingival pocket samples according to categories of mesiobuccal probing depths and clinical attachment levels (categorized as ≤2, 3 and ≥4 mm).

|                 | <i>P. gingivalis</i>                               | <i>A. actinomy-</i><br><i>cetemcomitans</i> | <i>F. nucleatum</i>                                                   | <i>S. sanguinis</i>          | <i>Archaea</i>    | % <i>Archaea</i> | Total bacteria      | Sum score                                                             |
|-----------------|----------------------------------------------------|---------------------------------------------|-----------------------------------------------------------------------|------------------------------|-------------------|------------------|---------------------|-----------------------------------------------------------------------|
| mesiobuccal PD  |                                                    |                                             |                                                                       |                              |                   |                  |                     |                                                                       |
| ≤2 mm (N=46)    | 0 (0; 3.2·10 <sup>-5</sup> )                       | 0 (0; 0)                                    | 3.6·10 <sup>-4</sup> (0; 2.6·10 <sup>-3</sup> )                       | 0 (0; 1.2·10 <sup>-3</sup> ) | 0.00 (0.00; 0.00) | 0 (0; 0)         | 4.18 (3.97; 4.36)   | 1.7·10 <sup>-3</sup> (1.9·10 <sup>-4</sup> ; 9.9·10 <sup>-3</sup> )   |
| 3 mm (N=130)    | 0 (0; 3.7·10 <sup>-5</sup> )                       | 0 (0; 2.1·10 <sup>-5</sup> )                | 9.3·10 <sup>-4</sup> (0; 7.3·10 <sup>-3</sup> )                       | 0 (0; 8.8·10 <sup>-4</sup> ) | 0.00 (0.00; 0.00) | 0 (0; 0)         | 4.22 (4.00; 4.47)   | 3.0·10 <sup>-3</sup> (3.6·10 <sup>-4</sup> ; 2.7·10 <sup>-2</sup> )   |
| ≥4 mm (N=56)    | 6.3·10 <sup>-6</sup> (0; 1.3·10 <sup>-3</sup> )*** | 0 (0; 9.5·10 <sup>-5</sup> )                | 1.1·10 <sup>-3</sup> (0; 5.2·10 <sup>-3</sup> )                       | 0 (0; 1.0·10 <sup>-3</sup> ) | 0.00 (0.00; 0.00) | 0 (0; 0)         | 4.28 (3.99; 4.70)   | 3.5·10 <sup>-2</sup> (1.2·10 <sup>-2</sup> ; 3.8·10 <sup>-2</sup> ) * |
| mesiobuccal CAL |                                                    |                                             |                                                                       |                              |                   |                  |                     |                                                                       |
| ≤2 mm (N=100)   | 0 (0; 1.4·10 <sup>-5</sup> )                       | 0 (0; 0)                                    | 7.0·10 <sup>-4</sup> (0; 3.1·10 <sup>-3</sup> )                       | 0 (0; 8.0·10 <sup>-4</sup> ) | 0 (0; 0)          | 0 (0; 0)         | 4.23 (3.99; 4.46)   | 1.0·10 <sup>-3</sup> (8.2·10 <sup>-5</sup> ; 7.2·10 <sup>-3</sup> )   |
| 3 mm (N=38)     | 6.5·10 <sup>-7</sup> (0; 7.4·10 <sup>-4</sup> ) *  | 0 (0; 2.6·10 <sup>-5</sup> )                | 6.0·10 <sup>-4</sup> (0; 4.8·10 <sup>-3</sup> )                       | 0 (0; 1.3·10 <sup>-3</sup> ) | 0 (0; 2.34) *     | 0 (0; 0.48) *    | 4.24 (4.05; 4.57)   | 2.0·10 <sup>-3</sup> (2.6·10 <sup>-4</sup> ; 6.1·10 <sup>-3</sup> )   |
| ≥4 mm (N=48)    | 8.5·10 <sup>-6</sup> (0; 1.2·10 <sup>-3</sup> ) *  | 0 (0; 9.7·10 <sup>-5</sup> ) *              | 1.9·10 <sup>-3</sup> (3.0·10 <sup>-4</sup> ; 6.9·10 <sup>-3</sup> ) * | 0 (0; 1.0·10 <sup>-3</sup> ) | 0 (0; 1.19) *     | 0 (0; 0.25)      | 4.33 (4.09; 4.75) * | 3.8·10 <sup>-3</sup> (6.2·10 <sup>-4</sup> ; 3.2·10 <sup>-2</sup> ) * |

The Sum score was defined as the sum of relative abundances for *P. gingivalis* + *A. actinomycetemcomitans* + *F. nucleatum*. \*,\*\* P<0.05 in Mann-Whitney U tests (versus ≤2 mm or versus 3 mm, respectively); PD, probing depth; CAL, clinical attachment level

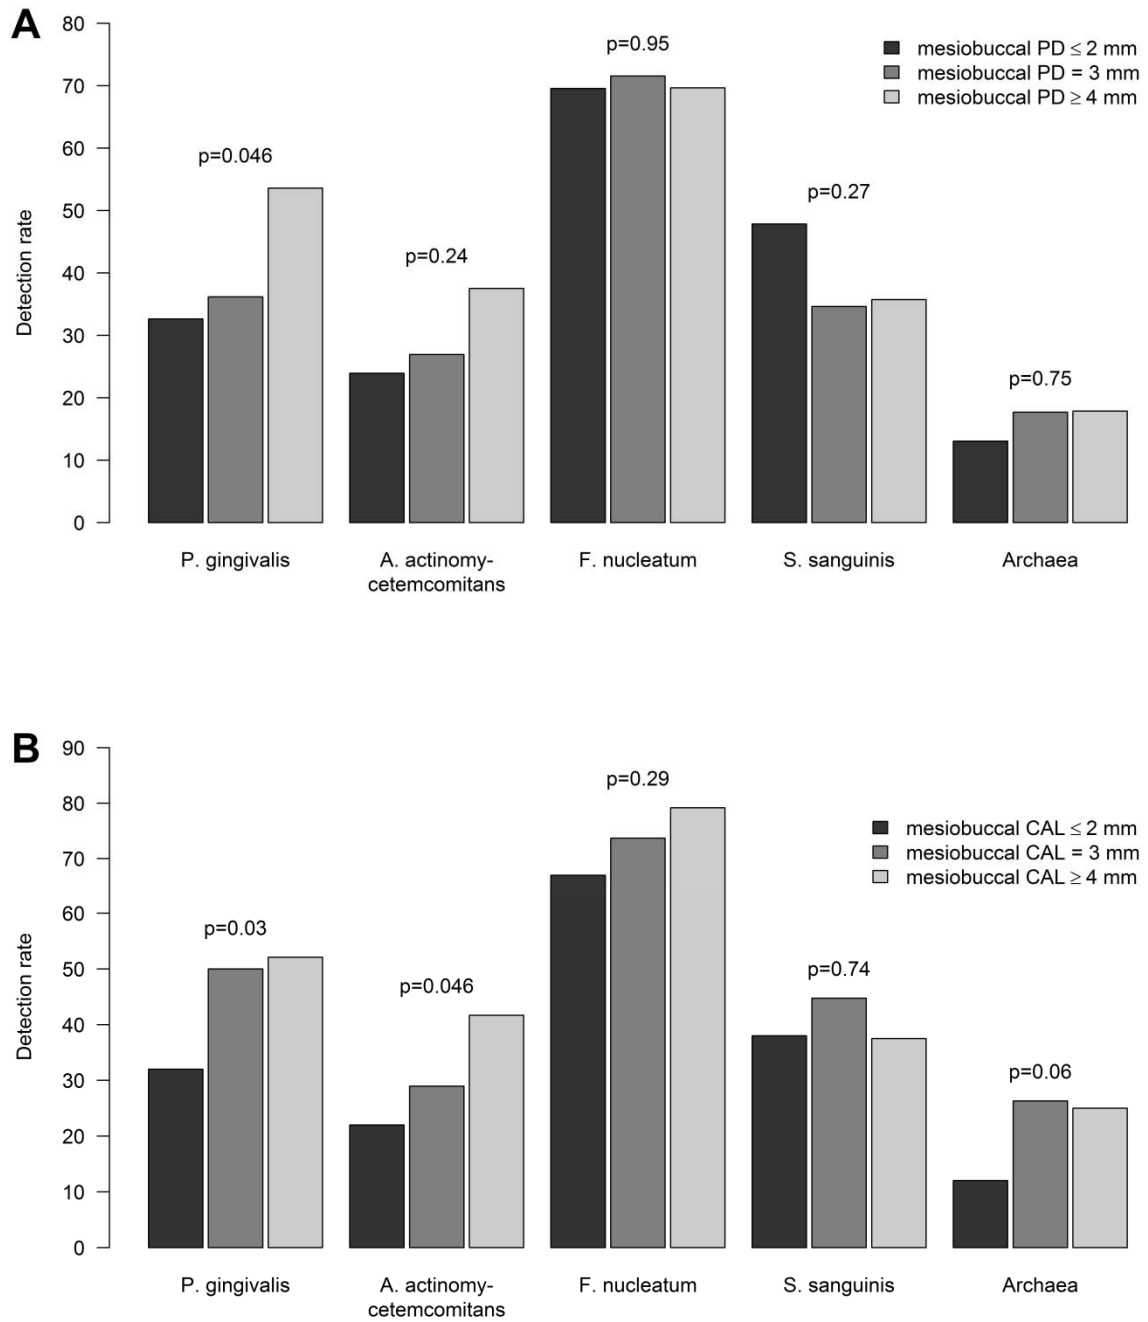

**Supplemental Figure 1.** Detection rates of bacteria in subgingival plaques according to (A) mesiobuccal probing depth (PD) or to (B) mesiobuccal clinical attachment level (CAL). P values were calculated from Chi squared tests evaluating differences in detection rates among groups.

## REFERENCES

1. Morillo JM, Lau L, Sanz M, et al. Quantitative real-time polymerase chain reaction based on single copy gene sequence for detection of periodontal pathogens. *J Clin Periodontol*. 2004 Dec;31(12):1054-60. doi: CPE608 [pii] 10.1111/j.1600-051x.2004.00608.x. PubMed PMID: 15560805; eng.
2. Gohler A, Hetzer A, Holtfreter B, et al. Quantitative molecular detection of putative periodontal pathogens in clinically healthy and periodontally diseased subjects. *PLoS One*. 2014;9(7):e99244. doi: 10.1371/journal.pone.0099244 PONE-D-14-03721 [pii]. PubMed PMID: 25029268; PubMed Central PMCID: PMC4100758. eng.
3. Morikawa M, Chiba T, Tomii N, et al. Comparative analysis of putative periodontopathic bacteria by multiplex polymerase chain reaction. *J Periodontal Res*. 2008 Jun;43(3):268-74. doi: 10.1111/j.1600-0765.2007.01025.x JRE1025 [pii]. PubMed PMID: 18447853; eng.
4. Suzuki MT, Taylor LT, DeLong EF. Quantitative analysis of small-subunit rRNA genes in mixed microbial populations via 5'-nuclease assays. *Appl Environ Microbiol*. 2000 Nov;66(11):4605-14. PubMed PMID: 11055900; PubMed Central PMCID: PMC92356. eng.
5. Yang S, Lin S, Kelen GD, et al. Quantitative multiprobe PCR assay for simultaneous detection and identification to species level of bacterial pathogens. *J Clin Microbiol*. 2002 Sep;40(9):3449-54. PubMed PMID: 12202592; PubMed Central PMCID: PMC130696. eng.
